# Supplementary material for: Possibility of making aerophobic surfaces by nanoprotrusions: an investigation of atomic-scale friction of the air–solid interfaces
Source: Royal Society of Chemistry journal article supplement (doi:10.1039/d0cp06404a), 2021-01-01
Supplement: d0cp06404a1.pdf [file d0cp06404a1.pdf]

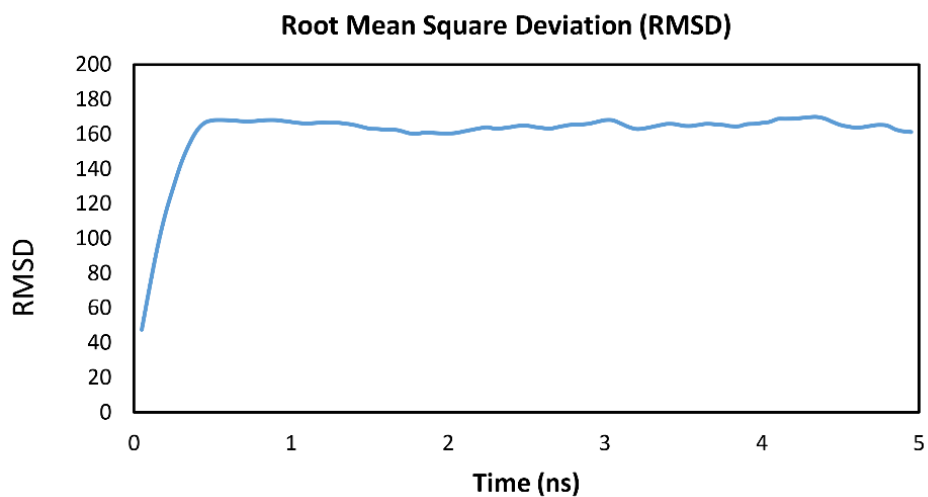

**Figure 1S.** The root mean square displacement (RMSD) of the simulated system

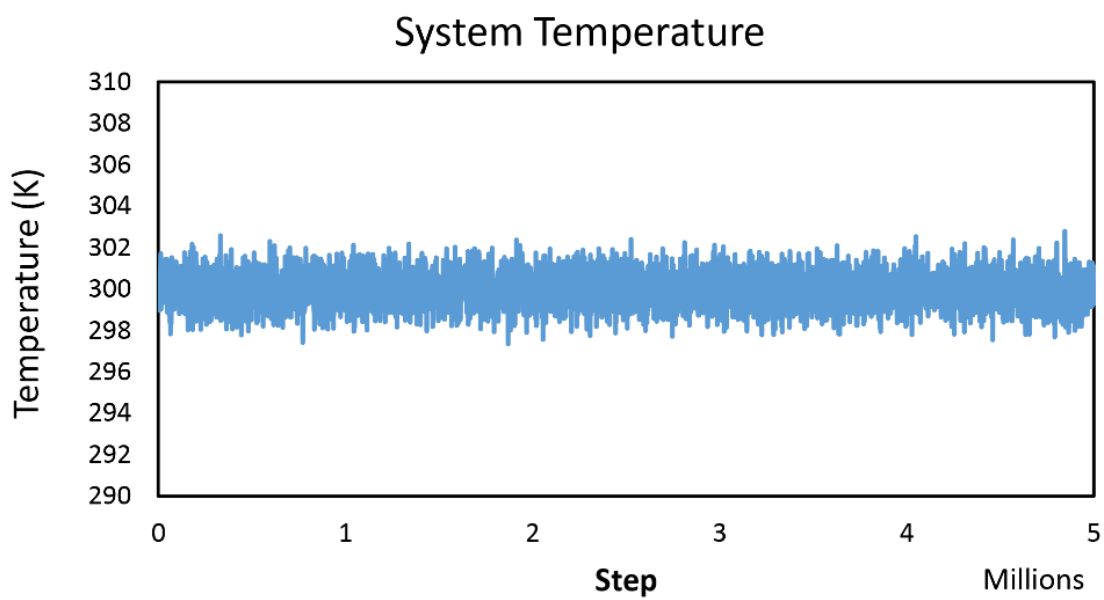

**Figure 2S.** The temperature fluctuation of the NPT simulated system at 300 K.

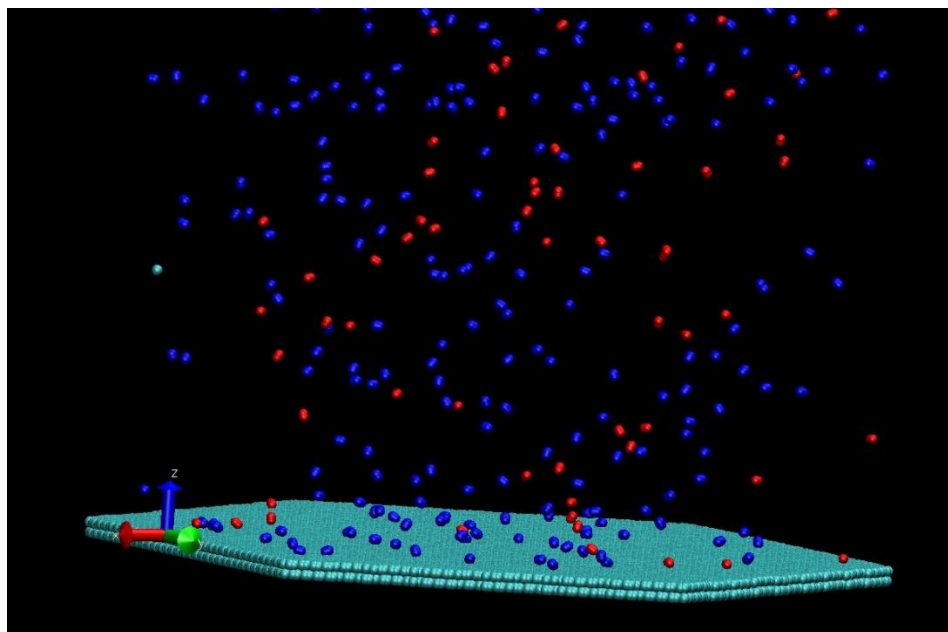

**Figure 3S.** A snapshot of the simulation system. The cyan layers represent the solid surface and N<sub>2</sub>, O<sub>2</sub>, and Argon atoms are shown by blue, red, and cyan circles, respectively.

**Table 1S.** The statistical t-test used to determine the significance of interaction results for the smooth and patterned graphene solid surface.

| Table Analyzed                          | Row stats of Data 1 |
|-----------------------------------------|---------------------|
| Column B                                | Smooth Graphene     |
| vs.                                     | vs.                 |
| electrnm A                              | Patterned Graphene  |
| Unpaired t test with Welch's correction |                     |
| P value                                 | <b>0.5844</b>       |
| P value summary                         | ns                  |
| Significantly different (P < 0.05)?     | <b>No</b>           |
| One- or two-tailed P value?             | Two-tailed          |
| Welch-corrected t, df                   | t=0.5476 df=249.8   |

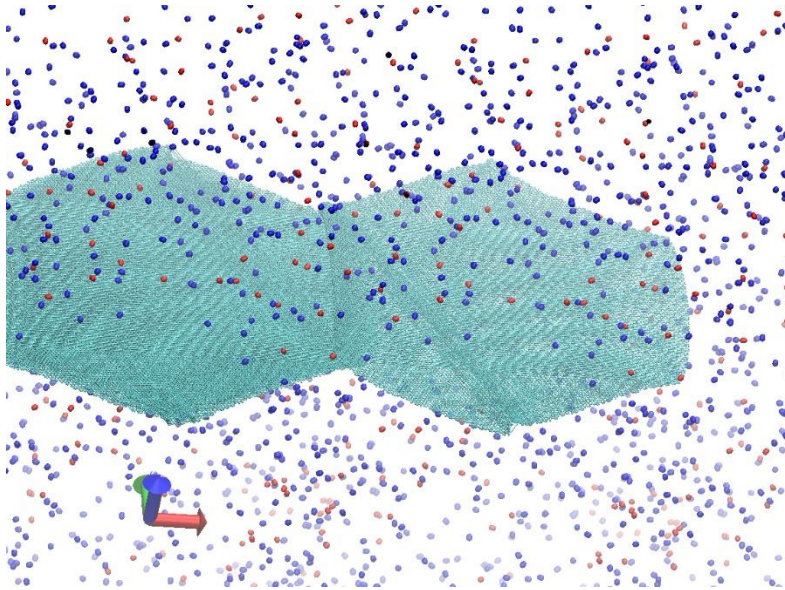

**Figure 4S.** Separation of graphene monolayers by fluid shear force in supersonic regime (1800 km/h)
